# Supplementary material for: Assessing European Wheat Sensitivities to Parastagonospora nodorum Necrotrophic Effectors and Fine-Mapping the Snn3-B1 Locus Conferring Sensitivity to the Effector SnTox3
Source: PubMed Central journal article supplement (PMC6039772; doi:10.3389/fpls.2018.00881), 2018-07-04
Supplement: Table_1.pdf [file Table_1.pdf]

**Supplementary Table 1.** Association mapping panel SnToxA, SnTox1 and SnTox3 phenotypic data (mean of 3-4 replicates per variety). Score 0 = insensitive, score 4 = highly sensitive. SGH = seasonal growth habit (S=spring, W=winter. <sup>1</sup>Our phenotype data. <sup>2</sup>Source = European Wheat Database, <http://genbank.vurv.cz/ewdb/>. <sup>3</sup>Other online sources). NA = missing data. Year = consensus varietal release date, based on the information listed in column ‘Year source’. BR control = brown rust control variety. <sup>†</sup>Listed UK = first year on UK National List; trial UK = first year in trial for UK Recommended List; genbank cz = year listed in the European Wheat Database, <http://genbank.vurv.cz/ewdb/>.

| Ordered Variety          | SGH                | Origin | Year | Year source <sup>†</sup> | SnToxA | SnTox1 | SnTox3 |
|--------------------------|--------------------|--------|------|--------------------------|--------|--------|--------|
| S1117_RAFFLES            | S                  | GBR    | 1997 | listed uk                | 4.00   | 0.50   | 4.00   |
| S0117_MARIS_HALBERD      | S                  | GBR    | 1972 | genbank cz               | 2.00   | 3.25   | 4.00   |
| S1591_AC_BARRIE          | S                  | CAN    | 2003 | listed uk                | 2.33   | 4.00   | 4.00   |
| S0017_MARIS_ENSIGN       | S                  | GBR    | 1968 | genbank cz               | 0.00   | 4.00   | 4.00   |
| S0185_SICCO              | S                  | NLD    | 1973 | genbank cz               | 4.00   | 4.00   | 4.00   |
| S0248_HIGHBURY           | S                  | GBR    | 1968 | genbank cz               | 0.00   | 2.00   | 4.00   |
| S0249_AINTREE            | S                  | GBR    | 1981 | genbank cz               | 1.50   | 2.00   | 4.00   |
| S0337_SANDOWN            | S                  | GBR    | 1980 | genbank cz               | 2.33   | 4.00   | 0.00   |
| S0406_NEWMARKET          | S                  | GBR    | NA   | genbank cz               | 4.00   | 3.75   | 0.00   |
| S0455_HAYDOCK            | S                  | GBR    | NA   | genbank cz               | 3.50   | 3.00   | 0.00   |
| S0494_SOLITAIRE          | S                  | GBR    | 1985 | genbank cz               | 1.00   | 4.00   | 1.00   |
| S0497_JERICO             | S                  | FRA    | 1983 | listed uk                | 4.00   | 1.00   | 4.00   |
| S0052_MARIS_DOVE         | S                  | GBR    | 1971 | genbank cz               | 4.00   | 2.50   | 4.00   |
| S0053_MARIS_BUTLER       | S                  | GBR    | 1972 | genbank cz               | 1.25   | 0.25   | 4.00   |
| S0547_WEMBLEY            | S                  | GBR    | 1984 | listed uk                | 3.25   | 0.00   | 0.25   |
| S0919_CHABLIS            | S                  | GBR    | 1994 | listed uk                | 0.00   | 2.00   | 2.00   |
| S0920_SHIRAZ             | S                  | GBR    | 1994 | listed uk                | 4.00   | 3.00   | 4.00   |
| U100100_ANGLIA           | W <sup>1</sup>     | GBR    | 1987 | genbank cz               | 0.00   | 3.50   | 1.50   |
| U100136_ARINA            | W <sup>3</sup>     | CHE    | 1981 | genbank cz               | 0.00   | 2.50   | 3.50   |
| U100273_CAPELLE_DESPREZ  | W                  | FRA    | 1946 | genbank cz               | NA     | NA     | NA     |
| U100347_COURTOT          | S <sup>1</sup>     | FRA    | 1974 | genbank cz               | 4.00   | 3.00   | 1.00   |
| U100460_ETOILE_DE_CHOISY | W <sup>1,2</sup>   | FRA    | 1950 | genbank cz               | 1.00   | 4.00   | 2.50   |
| U100546_GARNET           | S <sup>1</sup>     | CAN    | 1926 | genbank cz               | 4.00   | 4.00   | 4.00   |
| U100578_GREIF            | W <sup>1,2</sup>   | DEU    | 1989 | genbank cz               | 0.50   | 3.75   | 2.25   |
| U100825_MONOPOL          | W <sup>1,2,3</sup> | DEU    | 1975 | genbank cz               | 2.00   | 3.00   | 4.00   |
| U100874_OKAPI            | W <sup>3</sup>     | DEU    | 1978 | genbank cz               | 0.00   | 3.00   | 2.00   |
| U101082_SELKIRK          | S <sup>1</sup>     | CAN    | 1953 | genbank cz               | NA     | NA     | NA     |
| U101237_VIKING           | W <sup>1,2,3</sup> | DNK    | 1956 | genbank cz               | 2.00   | 4.00   | 3.00   |
| U101246_VUKA             | W <sup>1,2,3</sup> | DEU    | 1975 | genbank cz               | NA     | NA     | NA     |
| U101415_IBIS             | W <sup>3</sup>     | DEU    | 1962 | genbank cz               | 0.00   | 3.25   | 4.00   |
| U112030_TAMBOR           | W <sup>1</sup>     | DEU    | 1995 | genbank cz               | 0.00   | 4.00   | 1.75   |
| U112495_ISENGRAIN        | W <sup>3</sup>     | FRA    | 1997 | genbank cz               | 4.00   | 1.67   | 4.00   |
| U112544_AMAROK           | W <sup>3</sup>     | FRA    | NA   | genbank cz               | 4.00   | 3.50   | 4.00   |
| U112547_ARONDE           | S <sup>1</sup>     | FRA    | 1962 | genbank cz               | 0.00   | 3.50   | 4.00   |
| U112943_LORRAINE         | W <sup>1</sup>     | FRA    | 1998 | genbank cz               | 0.00   | 0.67   | 0.25   |
| U113096_BOSTON           | W <sup>1</sup>     | NLD    | NA   | NA                       | 0.00   | 0.25   | 2.50   |
| U9000_80_30_VERSAILLES   | W <sup>3</sup>     | FRA    | NA   | NA                       | 4.00   | 3.75   | 3.50   |
| U9001_BERSEE             | W <sup>1,2,3</sup> | FRA    | 1936 | genbank cz               | 1.13   | 4.00   | 1.13   |
| U9002_BILBO              | W <sup>1</sup>     | GBR    | 1972 | genbank cz               | 0.25   | 0.00   | 0.33   |

|                            |                    |     |      |            |      |      |      |
|----------------------------|--------------------|-----|------|------------|------|------|------|
| U9003_CARSTENS_V           | W <sup>3</sup>     | DEU | 1921 | genbank cz | NA   | NA   | NA   |
| U9004_CARSTENS_VIII        | W <sup>1</sup>     | DEU | 1952 | genbank cz | 0.00 | 0.75 | 4.00 |
| U9005_CLEO                 | W <sup>1,3</sup>   | NLD | 1961 | genbank cz | 0.00 | 2.00 | 1.50 |
| U9006_DW929620_511         | NA                 | GBR | NA   | NA         | 4.00 | 3.50 | 4.00 |
| U9007_DW930861_509         | NA                 | GBR | NA   | NA         | 0.00 | 2.00 | 1.00 |
| U9008_ELYSEE               | S <sup>1</sup>     | FRA | 1968 | genbank cz | 0.00 | 0.00 | 1.00 |
| U9010_HEINES_110           | W <sup>1,2</sup>   | DEU | 1969 | genbank cz | 4.00 | 3.25 | 3.25 |
| U9011_HEINES_PEKO          | S <sup>1</sup>     | DEU | 1946 | genbank cz | NA   | NA   | NA   |
| U9012_HOLDFAST             | W <sup>1,2,3</sup> | GBR | 1936 | genbank cz | 1.50 | 0.00 | 3.99 |
| U9013_HYBRID_46            | W <sup>1,3</sup>   | FRA | 1936 | genbank cz | 0.00 | 2.25 | 1.00 |
| U9014_HYBRIDE_DU_JONCQUOIS | W <sup>1</sup>     | FRA | 1933 | genbank cz | 0.00 | 4.00 | 0.75 |
| U9015_JUFY_I               | S <sup>1</sup>     | BEL | 1954 | genbank cz | 0.25 | 2.75 | 3.50 |
| U9016_KOGA_I               | S <sup>1,3</sup>   | DEU | NA   | NA         | 4.00 | 2.00 | 2.00 |
| U9017_KOGA_II              | S <sup>1</sup>     | DEU | NA   | NA         | 0.00 | 2.00 | 3.75 |
| U9018_KRANICH              | W <sup>1,2</sup>   | DEU | 1969 | genbank cz | 1.00 | 2.00 | 4.00 |
| U9019_KRONJUWEL            | W <sup>1,2</sup>   | DEU | 1981 | genbank cz | 1.00 | 0.00 | 0.50 |
| U9020_MARNE_DESPREZ        | W <sup>1,2</sup>   | FRA | 1954 | genbank cz | NA   | NA   | NA   |
| U9021_MINISTER             | W <sup>1,2</sup>   | BEL | 1947 | genbank cz | 0.25 | 3.75 | 1.25 |
| U9022_NORD_DESPREZ         | W <sup>1,3</sup>   | FRA | 1945 | genbank cz | 0.00 | 0.75 | 0.00 |
| U9023_NSL_92_5719          | NA                 | GBR | NA   | NA         | 0.00 | 0.00 | 3.00 |
| U9024_NSL_93_5372          | NA                 | GBR | NA   | NA         | 0.00 | 0.00 | 1.25 |
| U9025_NSL_94_5130          | NA                 | GBR | NA   | NA         | 0.33 | 0.00 | 1.33 |
| U9026_NSL_94_6897          | NA                 | GBR | NA   | NA         | 0.00 | 0.00 | 0.25 |
| U9027_NSL_WW13             | NA                 | GBR | NA   | NA         | 0.25 | 2.25 | 0.00 |
| U9028_OBELISK              | W <sup>3</sup>     | NLD | 1985 | genbank cz | 1.25 | 2.75 | 4.00 |
| U9029_POROS                | W <sup>2</sup>     | DEU | 1966 | genbank cz | 0.75 | 2.00 | 2.00 |
| U9030_PROFESSEUR_DELOS     | W <sup>1,2</sup>   | BEL | 1937 | genbank cz | 1.00 | NA   | NA   |
| U9031_PROFESSEUR_MARCHAL   | W <sup>1,2,3</sup> | BEL | 1957 | genbank cz | 1.50 | NA   | NA   |
| U9032_RIEBESEL_57/41       | W <sup>1</sup>     | DEU | NA   | NA         | 4.00 | 1.00 | 4.00 |
| U9033_STELLA               | W <sup>1</sup>     | BEL | 1957 | genbank cz | 0.00 | 1.00 | 2.25 |
| U9034_TADEPI               | W <sup>1,3</sup>   | FRA | 1949 | genbank cz | 0.00 | 2.50 | 0.00 |
| U9035_TADORNA              | W <sup>2,3</sup>   | NLD | 1966 | genbank cz | 0.00 | 2.50 | 2.00 |
| U9036_THATCHER             | S <sup>1,2</sup>   | USA | 1934 | genbank cz | NA   | NA   | NA   |
| U9038_VILMORIN_23          | W <sup>1,2</sup>   | FRA | 1923 | genbank cz | NA   | NA   | NA   |
| U9039_VILMORIN_27          | W <sup>3</sup>     | FRA | 1928 | genbank cz | NA   | NA   | NA   |
| U9040_VILMORIN_29          | W <sup>1,2</sup>   | FRA | 1929 | genbank cz | 0.50 | 2.25 | NA   |
| U9042_WH929623_5           | NA                 | NA  | NA   | NA         | 0.00 | 3.50 | 1.00 |
| U9043_YEOMAN               | W <sup>3</sup>     | FRA | 1916 | genbank cz | 0.00 | 2.75 | 3.25 |
| W0010_MILDRESS             | W                  | NLD | 1964 | trial uk   | 1.00 | 3.33 | 3.50 |
| W1003_VIVANT               | W                  | GBR | 1990 | BR ref     | 4.00 | 4.00 | 4.00 |
| W1008_JACADI               | W                  | FRA | 1997 | listed uk  | 0.25 | 4.00 | 4.00 |
| W1014_BANKER               | W                  | GBR | 1996 | listed uk  | 0.25 | 4.00 | 1.25 |
| W1019_TEMPLE               | W                  | NA  | 1996 | listed uk  | 0.00 | 3.75 | 0.00 |
| W1020_TILBURI              | W                  | FRA | 1994 | BR ref     | 4.00 | 3.50 | 2.75 |
| W1028_TEMPEST              | W                  | NA  | 1997 | listed uk  | 0.00 | 2.50 | 2.75 |
| W1029_BLAZE                | W                  | GBR | 1996 | listed uk  | 0.00 | 2.00 | 4.00 |
| W0103_MARIS_FREEMAN        | W                  | GBR | 1970 | trial uk   | 0.00 | 2.25 | 0.25 |
| W1030_CANTATA              | W                  | GBR | 1996 | listed uk  | 0.00 | 1.50 | 0.00 |
| W1031_FALSTAFF             | W                  | GBR | 1997 | listed uk  | 0.00 | 4.00 | 4.00 |
| W1033_SAVANNAH             | W                  | GBR | 1996 | listed uk  | 0.00 | 1.67 | 1.50 |
| W1035_MAVERICK             | W                  | GBR | 1996 | listed uk  | 0.00 | 0.33 | 4.00 |
| W1039_CHAUCER              | W                  | GBR | 1996 | listed uk  | 0.00 | 0.00 | 0.67 |

|                      |   |     |      |            |      |      |      |
|----------------------|---|-----|------|------------|------|------|------|
| W1040_WESTON         | W | GBR | 1996 | listed uk  | 0.00 | 2.75 | 0.67 |
| W1046_OBERON         | W | GBR | 1996 | listed uk  | 0.00 | 2.75 | 2.00 |
| W1047_KRAKATOA       | W | GBR | 1996 | listed uk  | 0.00 | 2.50 | 3.75 |
| W1048_WELLINGTON     | W | GBR | 1997 | listed uk  | 1.50 | 1.75 | 0.00 |
| W0105_MARIS_MARKSMAN | W | GBR | 1975 | trial uk   | 0.25 | 1.25 | 2.33 |
| W1062_SHANGO         | W | GBR | 1995 | trial uk   | 0.00 | 2.75 | 1.00 |
| W1070_CLAIRE         | W | GBR | 1997 | listed uk  | 0.50 | 2.15 | 1.01 |
| W1078_MARSHAL        | W | GBR | 1997 | listed uk  | 0.00 | 3.00 | 3.25 |
| W1088_ROSETTE        | W | NA  | 1997 | listed uk  | 0.25 | 0.75 | 4.00 |
| W0109_MEGA           | W | GBR | 1970 | trial uk   | 0.00 | 4.00 | 0.00 |
| W1092_SHAMROCK       | W | FRA | 1997 | listed uk  | 0.00 | 4.00 | 4.00 |
| W0110_CARIBO         | W | DEU | 1968 | genbank cz | 0.75 | 0.00 | 1.25 |
| W1100_BUCHAN         | W | GBR | 1997 | listed uk  | NA   | NA   | NA   |
| W1108_DATUM          | W | GBR | 1999 | listed uk  | 0.00 | 2.00 | 3.00 |
| W0111_ATOU           | W | FRA | 1970 | trial uk   | 0.00 | 3.50 | 4.00 |
| W1111_AARDVARK       | W | GBR | 1997 | listed uk  | 0.00 | 0.00 | 1.75 |
| W1115_DICKINS        | W | NA  | 1998 | listed uk  | 4.00 | 0.00 | 2.00 |
| W1120_FLAIR          | W | DEU | 1996 | BR ref     | 0.00 | 0.00 | 0.00 |
| W1122_ATOLL*         | W | FRA | 1996 | BR ref     | 0.00 | 0.00 | 1.00 |
| W1126_ECLIPSE        | W | GBR | 1999 | listed uk  | 0.00 | 0.00 | 4.00 |
| W1133_AGAMI          | W | GBR | 1996 | BR ref     | 0.00 | 0.00 | 2.75 |
| W1137_BROILER        | W | GBR | 1999 | listed uk  | 0.00 | 0.25 | 0.00 |
| W1147_NAPIER         | W | GBR | 1998 | listed uk  | 0.00 | 0.00 | 1.00 |
| W1149_WICKHAM        | W | GBR | 1998 | listed uk  | 0.00 | 0.00 | 0.00 |
| W1151_CHICAGO        | W | GBR | 1998 | listed uk  | 0.00 | 0.00 | 3.50 |
| W1152_EXPLOSIV       | W | GBR | 1999 | listed uk  | 0.00 | 0.00 | 0.00 |
| W1153_GENGHIS        | W | GBR | 1999 | listed uk  | 0.50 | 3.50 | 4.00 |
| W1155_DENVER*        | W | GBR | 1998 | listed uk  | 0.00 | 2.00 | 2.50 |
| W1156_BRANDO         | W | GBR | 1999 | listed uk  | 0.00 | 4.00 | 4.00 |
| W1157_RANGER         | W | GBR | 1998 | listed uk  | 0.75 | 3.50 | 3.33 |
| W1161_DERWENT*       | W | USA | 1999 | listed uk  | 0.00 | 3.00 | 4.00 |
| W1169_MEXICO         | W | NA  | 1998 | listed uk  | 0.00 | 2.00 | 2.75 |
| W1184_ARLINGTON      | W | USA | 2000 | listed uk  | 0.00 | 2.75 | 3.50 |
| W1195_VERDON         | W | FRA | 1999 | listed uk  | 1.00 | 2.00 | 2.33 |
| W1196_ELECTRON       | W | FRA | 2000 | listed uk  | 0.00 | 0.67 | 4.00 |
| W1197_DORIAL         | W | FRA | 1999 | listed uk  | 0.00 | 0.00 | 0.00 |
| W1199_MILESTONE      | W | GBR | 1999 | listed uk  | NA   | NA   | NA   |
| W1200_OPTION         | W | GBR | 1999 | listed uk  | 0.00 | 1.50 | 2.00 |
| W1201_REYDON         | W | GBR | 1999 | listed uk  | 0.00 | 2.25 | 2.00 |
| W1202_OXBOW          | W | GBR | 1999 | listed uk  | 0.00 | 1.25 | 1.00 |
| W1204_SLADE          | W | GBR | 1999 | listed uk  | 0.00 | 2.50 | 2.33 |
| W1205_POTENT         | W | GBR | 1999 | listed uk  | 0.00 | 2.00 | 3.75 |
| W1206_GOLDLACE       | W | GBR | 1999 | listed uk  | 0.50 | 2.50 | 4.00 |
| W1210_ORTON          | W | GBR | 2000 | listed uk  | 0.00 | 0.50 | 0.00 |
| W1211_ODYSSEY        | W | GBR | 1999 | listed uk  | 0.00 | 1.75 | 3.50 |
| W1213_EXSEPT         | W | DEU | 1999 | listed uk  | 1.25 | 3.50 | 4.00 |
| W1220_DEBEN          | W | GBR | 1999 | listed uk  | 0.00 | 2.25 | 2.00 |
| W1222_ARRIVA         | W | GBR | 1999 | listed uk  | 0.25 | 4.00 | 1.75 |
| W1223_CANTERBURY     | W | GBR | 1999 | listed uk  | 0.00 | 0.50 | 0.00 |
| W1224_CYBER          | W | GBR | 1997 | BR ref     | 4.00 | 2.50 | 4.00 |
| W1226_TRAVIX         | W | GBR | 2000 | listed uk  | 0.00 | 2.50 | 4.00 |
| W1227_BISCAY         | W | GBR | 1999 | listed uk  | 0.00 | 0.00 | 1.67 |
| W1233_ARK            | W | DEU | 2000 | listed uk  | 0.00 | 0.00 | 0.67 |

|                   |   |     |      |            |      |      |      |
|-------------------|---|-----|------|------------|------|------|------|
| W1235_EPOCH       | W | NA  | 1997 | BR ref     | 0.00 | 1.50 | 4.00 |
| W1240_NEXUS       | W | NA  | 1997 | BR ref     | 0.00 | 0.00 | 0.00 |
| W1249_CHEQUER     | W | GBR | 1998 | BR ref     | 0.00 | 1.25 | 0.67 |
| W1251_HARROW      | W | GBR | 1998 | BR ref     | 0.25 | 1.50 | 2.50 |
| W1257_RICHMOND    | W | GBR | 2000 | listed uk  | 0.33 | 1.50 | 1.75 |
| W1258_CHATSWORTH  | W | NLD | 2000 | listed uk  | 0.00 | 0.00 | 0.33 |
| W1259_WOBURN      | W | NLD | 2000 | listed uk  | 1.00 | 3.25 | 4.00 |
| W1262_MACRO       | W | GBR | 2000 | listed uk  | NA   | 2.00 | 2.50 |
| W1263_FENDER      | W | GBR | 2001 | listed uk  | 1.50 | 2.75 | 2.75 |
| W1266_ACCESS      | W | GBR | 2000 | listed uk  | NA   | 2.75 | 3.50 |
| W1267_ANGLO       | W | GBR | 2000 | listed uk  | NA   | 2.75 | 2.50 |
| W1269_POSIT       | W | GBR | 2000 | listed uk  | 2.00 | 4.00 | 4.00 |
| W1270_COMET       | W | GBR | 1998 | BR ref     | 2.00 | 3.75 | 4.00 |
| W1271_FEAST       | W | GBR | 2000 | listed uk  | 1.75 | 4.00 | 4.00 |
| W1272_RAMPART     | W | GBR | 2000 | listed uk  | 1.33 | 2.50 | 4.00 |
| W1273_VAULT       | W | GBR | 1998 | BR ref     | 1.00 | 2.00 | 2.67 |
| W1275_KEMPT       | W | GBR | 1998 | BR ref     | 0.00 | 4.00 | 4.00 |
| W1276_ALCHEMIST   | W | GBR | 2000 | listed uk  | NA   | 4.00 | 4.00 |
| W1277_FRELON      | W | GBR | 2001 | listed uk  | 4.00 | 2.00 | 0.00 |
| W1278_PHLEBAS     | W | GBR | 2000 | listed uk  | 0.00 | 3.75 | 0.00 |
| W1280_A13_98      | W | DNK | NA   | NA         | 0.00 | 2.00 | 4.00 |
| W1281_XI19        | W | NLD | 2000 | listed uk  | 4.00 | 3.87 | 4.00 |
| W1282_SOLSTICE*   | W | NLD | 2001 | listed uk  | 3.75 | 1.75 | 4.00 |
| W1286_STORM       | W | NLD | 2000 | listed uk  | 0.00 | 2.00 | 4.00 |
| W1292_VIRTUOSE    | W | FRA | 1998 | BR ref     | 0.00 | 1.00 | 4.00 |
| W1295_SABRE*      | W | GBR | 2000 | listed uk  | 0.00 | 0.00 | 0.50 |
| W1300_WINDSOR     | W | DEU | 1998 | BR ref     | 0.00 | 2.25 | 4.00 |
| W1310_CAPNOR      | W | FRA | 1999 | BR ref     | 0.00 | 0.50 | 4.00 |
| W1321_PR21R60     | W | NA  | 2001 | listed uk  | 0.00 | 1.00 | 4.00 |
| W1326_TELLUS      | W | GBR | 2002 | listed uk  | 0.00 | 2.75 | 4.00 |
| W1327_BRUNEL      | W | GBR | 2001 | listed uk  | 0.00 | 2.00 | 4.00 |
| W1328_WIZARD***   | W | GBR | 2002 | listed uk  | 0.00 | 0.00 | 0.50 |
| W1329_ZAKA        | W | GBR | 2002 | listed uk  | 0.00 | 2.00 | 2.75 |
| W0133_TALENT      | W | FRA | 1973 | genbank cz | 0.00 | 0.00 | 0.00 |
| W1330_ROBIGUS     | W | GBR | 2002 | listed uk  | 0.00 | 1.03 | 1.50 |
| W1331_CONTEXT     | W | GBR | 2001 | listed uk  | 0.00 | 2.33 | 2.00 |
| W1332_CONVOY      | W | GBR | 2001 | listed uk  | 0.00 | 4.00 | 4.00 |
| W1333_ASHANTI     | W | GBR | 2001 | listed uk  | 0.00 | 1.67 | 0.00 |
| W1335_SCORPION_25 | W | GBR | 2001 | listed uk  | 4.00 | 4.00 | 4.00 |
| W1336_WARLOCK_24  | W | GBR | 2001 | listed uk  | 4.00 | 4.00 | 4.00 |
| W0134_CLEMENT     | W | NLD | 1971 | trial uk   | 0.00 | 1.00 | 2.00 |
| W1343_CARLTON     | W | GBR | 2001 | listed uk  | 4.00 | 0.67 | 3.00 |
| W1353_GOODWILL    | W | GBR | 2001 | listed uk  | 0.00 | 2.50 | 3.00 |
| W1359_INSIGHT     | W | GBR | 2001 | listed uk  | 0.00 | 2.00 | 1.75 |
| W1361_MALLET      | W | GBR | 2001 | listed uk  | 0.00 | 0.50 | 3.00 |
| W1364_RIVET       | W | GBR | 2001 | listed uk  | 0.00 | 1.50 | 0.50 |
| W1367_FIELDER     | W | GBR | 2001 | listed uk  | 0.00 | 1.00 | 4.00 |
| W1370_HARBOUR     | W | GBR | 2001 | listed uk  | 0.00 | 1.67 | NA   |
| W1376_EINSTEIN    | W | GBR | 2002 | listed uk  | 0.00 | 0.75 | 2.00 |
| W1380_ARRAN       | W | GBR | 2002 | listed uk  | 0.00 | 1.33 | 1.00 |
| W1383_CHARDONNAY  | W | GBR | 2000 | trial uk   | 0.00 | 0.25 | 2.67 |
| W1388_CORDIALE    | W | GBR | 2003 | listed uk  | 0.00 | 3.63 | 0.50 |
| W1392_QUEST       | W | GBR | 2003 | listed uk  | 0.25 | 1.25 | 0.25 |

|                  |   |     |      |            |      |      |      |
|------------------|---|-----|------|------------|------|------|------|
| W1395_SENATOR    | W | GBR | 2003 | listed uk  | 0.67 | 2.67 | 2.25 |
| W1400_FLAXEN     | W | GBR | 2002 | listed uk  | 0.00 | 1.50 | 0.67 |
| W1407_AWARD      | W | DEU | 2002 | listed uk  | 0.25 | 0.67 | 2.00 |
| W1409_MAYFAIR    | W | NA  | 2002 | listed uk  | 0.00 | 2.25 | NA   |
| W1411_DICKSON    | W | NA  | 2002 | listed uk  | 0.00 | 2.25 | 1.25 |
| W1414_VECTOR     | W | GBR | 2002 | listed uk  | 0.00 | 0.33 | 3.33 |
| W1415_SMUGGLER   | W | GBR | 2002 | listed uk  | 0.00 | 2.67 | NA   |
| W1426_ISTABRAQ   | W | GBR | 2003 | listed uk  | 0.00 | 2.67 | 1.50 |
| W1427_NIJINSKY   | W | GBR | 2003 | listed uk  | 0.00 | 2.75 | 0.25 |
| W1428_SANCERRE   | W | NA  | 2003 | listed uk  | 0.00 | 1.75 | 0.00 |
| W1429_ALSACE     | W | FRA | 2002 | listed uk  | 0.25 | 2.00 | 2.75 |
| W1435_SW_TATAROS | W | DEU | 2003 | listed uk  | 1.50 | 4.00 | 1.00 |
| W1438_CAPHORN    | W | GBR | 2000 | BR ref     | 0.00 | 4.00 | 4.00 |
| W1439_DART*      | W | GBR | 2002 | listed uk  | 0.00 | 1.25 | 1.33 |
| W1441_MONUMENT   | W | GBR | 2002 | listed uk  | 0.00 | 2.00 | 2.00 |
| W1442_GLADIATOR* | W | GBR | 2002 | listed uk  | 0.00 | 2.28 | 4.00 |
| W1443_HERITAGE   | W | GBR | 2002 | listed uk  | 0.00 | 2.00 | 3.25 |
| W1444_M007       | W | NA  | 2002 | listed uk  | 0.00 | 3.25 | 4.00 |
| W1445_BELTER     | W | GBR | 2002 | listed uk  | 0.25 | 2.00 | 2.00 |
| W1447_BENTLEY    | W | FRA | 2002 | listed uk  | NA   | NA   | NA   |
| W1449_WELFORD    | W | GBR | 2002 | listed uk  | 0.00 | 1.67 | 3.50 |
| W1450_PENNANT*   | W | GBR | 2002 | listed uk  | 0.00 | 0.00 | 2.00 |
| W1456_RAGLAN     | W | GBR | 2003 | listed uk  | 0.00 | 1.33 | 3.25 |
| W1461_MAYFIELD   | W | GBR | 2003 | listed uk  | 0.00 | 1.75 | 4.00 |
| W1462_AMBROSIA   | W | GBR | 2003 | listed uk  | 0.00 | 0.00 | 0.00 |
| W1463_EQUATOR    | W | GBR | 2003 | listed uk  | 0.00 | 2.00 | 3.00 |
| W1464_EXTEND     | W | GBR | 2003 | listed uk  | 0.00 | 1.75 | 1.00 |
| W1467_MAGNITUDE  | W | GBR | 2003 | listed uk  | 0.00 | 1.25 | 3.25 |
| W1468_DEFENDER   | W | GBR | 2003 | listed uk  | 0.00 | 2.50 | 3.00 |
| W1469_SCANDIA    | W | GBR | 2003 | listed uk  | 0.00 | 4.00 | 3.25 |
| W1470_CHOICE*    | W | GBR | 2003 | listed uk  | 0.25 | 4.00 | 2.00 |
| W1477_ATLANTA    | W | GBR | 2004 | listed uk  | 0.00 | 0.00 | 0.50 |
| W1482_GLASGOW    | W | NA  | 2003 | listed uk  | 0.00 | 2.00 | 4.00 |
| W1489_ISIDOR     | W | FRA | 2002 | listed FRA | 0.00 | 0.50 | 4.00 |
| W1497_SAMURAI    | W | DEU | 2003 | listed uk  | 0.00 | 2.25 | 4.00 |
| W1499_PREDATOR   | W | GBR | 2003 | listed uk  | 0.00 | 3.33 | 3.75 |
| W1502_BROMPTON   | W | GBR | 2002 | trial uk   | 0.00 | 1.12 | 2.62 |
| W1511_CHESTER    | W | GBR | 2003 | listed uk  | 0.00 | 0.00 | 0.25 |
| W1512_EXETER     | W | FRA | 2003 | listed uk  | 0.50 | 1.50 | 0.50 |
| W1532_MASCOT*    | W | GBR | 2004 | listed uk  | 0.75 | 2.50 | 1.67 |
| W1541_PIRANHA    | W | GBR | 2004 | listed uk  | 0.25 | 1.25 | 4.00 |
| W1542_DIRECTOR   | W | GBR | 2004 | listed uk  | 1.00 | 1.00 | 2.67 |
| W1543_ASAGAI     | W | GBR | 2003 | trial uk   | 0.50 | 1.25 | 4.00 |
| W1545_ZEBEDEE    | W | GBR | 2004 | listed uk  | 1.00 | 1.33 | 2.67 |
| W1546_GATSBY     | W | GBR | 2004 | listed uk  | 0.00 | 2.00 | 4.00 |
| W1549_FASTNET    | W | GBR | 2004 | listed uk  | 0.50 | 4.00 | 2.50 |
| W1550_DOVER      | W | GBR | 2005 | listed uk  | 0.00 | 0.00 | 0.33 |
| W1556_HOURRA     | W | GBR | 2004 | listed uk  | 1.25 | 2.00 | 2.00 |
| W1561_HYPERION   | W | FRA | 2004 | listed uk  | 0.50 | 2.33 | 0.00 |
| W1564_ALCHEMY    | W | GBR | 2004 | listed uk  | 0.00 | 2.12 | 0.37 |
| W1573_AARDEN     | W | FRA | 2005 | listed uk  | 0.00 | 0.00 | 0.00 |
| W1577_HURLEY     | W | GBR | 2005 | listed uk  | 0.00 | 1.25 | 0.00 |
| W1578_KIPLING    | W | FRA | 2004 | listed uk  | 0.00 | 1.75 | 0.00 |

|                    |   |     |      |            |      |      |      |
|--------------------|---|-----|------|------------|------|------|------|
| W0158_MARIS_FUNDIN | W | GBR | 1972 | trial uk   | 0.00 | 3.25 | 0.00 |
| W1599_BATTALION    | W | GBR | 2005 | listed uk  | 0.00 | 4.00 | 1.00 |
| W1606_OCHRE        | W | GBR | 2003 | BR ref     | 0.00 | 0.50 | 0.00 |
| W1611_CONTENDER    | W | GBR | 2006 | listed uk  | 0.00 | 0.00 | 4.00 |
| W1621_GULLIVER     | W | GBR | 2005 | listed uk  | 0.00 | 2.00 | 4.00 |
| W1625_BENEDICT     | W | GBR | 2006 | listed uk  | 0.00 | 3.00 | 1.67 |
| W1649_SAHARA       | W | NLD | 2005 | listed uk  | 0.00 | 4.00 | 1.75 |
| W1652_HUMBER       | W | GBR | 2005 | listed uk  | 0.00 | 4.00 | 1.00 |
| W1658_OAKLEY       | W | GBR | 2006 | listed uk  | 1.50 | 2.25 | 4.00 |
| W1666_CANADAIR     | W | NA  | 2006 | listed uk  | 1.33 | 4.00 | 0.00 |
| W1667_BUZZER       | W | GBR | 2006 | listed uk  | 0.33 | 4.00 | 4.00 |
| W1668_MAXWELL      | W | NA  | 2006 | listed uk  | 0.00 | 0.67 | 0.00 |
| W1677_ROCKY*       | W | GBR | 2005 | trial uk   | 0.00 | 3.25 | 2.75 |
| W1680_MUSKETEER    | W | GBR | 2005 | trial uk   | 0.00 | 3.75 | 0.50 |
| W1687_MARKSMAN**   | W | GBR | 2006 | listed uk  | 0.00 | 4.00 | 2.50 |
| W0169_ALCEDO       | W | DEU | 1974 | genbank cz | 4.00 | 3.25 | 0.50 |
| W1695_BOWINDO      | W | GBR | 2007 | listed uk  | 0.00 | 4.00 | 2.00 |
| W1704_VELOCITY     | W | GBR | 2006 | listed uk  | 3.00 | 2.50 | 4.00 |
| W0171_HARDI        | W | NA  | 1969 | genbank cz | 0.67 | 3.00 | 0.00 |
| W1714_ORATOR       | W | FRA | 2007 | listed uk  | 0.00 | 3.00 | 4.00 |
| W1724_EMERALD      | W | GBR | 2007 | listed uk  | 1.00 | 4.00 | 0.67 |
| W1725_DUXFORD      | W | GBR | 2006 | listed uk  | 3.25 | 4.00 | 4.00 |
| W1726_LIMERICK     | W | GBR | 2006 | listed uk  | 4.00 | 3.25 | 4.00 |
| W1727_MONTY        | W | GBR | 2006 | listed uk  | 0.00 | 3.25 | 2.00 |
| W1728_ZANATAN      | W | GBR | 2006 | listed uk  | 0.25 | 4.00 | 1.50 |
| W0173_FLANDERS     | W | FRA | 1973 | trial uk   | 1.50 | NA   | 4.00 |
| W1731_HEREFORD     | W | DNK | 2005 | trial uk   | 0.00 | 4.00 | 0.33 |
| W1737_JB_DIEGO     | W | GBR | 2006 | listed uk  | 0.00 | 3.00 | 1.00 |
| W1746_WALPOLE      | W | NLD | 2005 | BR ref     | 4.00 | 2.00 | 4.00 |
| W1753_BATSMAN      | W | NA  | 2005 | BR ref     | 0.00 | 2.00 | 4.00 |
| W1756_LANGDALE     | W | GBR | 2005 | BR ref     | 0.00 | 1.75 | 4.00 |
| W1760_GALTIC       | W | FRA | 2005 | BR ref     | 0.00 | 4.00 | 4.00 |
| W1766_GALLANT      | W | GBR | 2005 | BR ref     | 0.00 | 2.75 | 0.75 |
| W1769_SHOGUN       | W | GBR | 2005 | BR ref     | 0.00 | 0.00 | 2.00 |
| W1779_CELEBRATION  | W | NA  | 2005 | BR ref     | 0.00 | 0.75 | 1.25 |
| W0178_KINSMAN      | W | GBR | 1973 | trial uk   | 0.00 | 3.75 | 4.00 |
| W1787_SCOUT        | W | GBR | 2005 | BR ref     | 1.00 | 0.00 | 1.00 |
| W1789_QPLUS        | W | NA  | 2005 | BR ref     | 0.25 | 0.00 | 4.00 |
| W0179_HOBBIT       | W | GBR | 1973 | trial uk   | 1.50 | 0.00 | 2.33 |
| W1790_LEAR         | W | GBR | 2005 | BR ref     | 1.25 | 0.75 | 3.50 |
| W1795_BANTAM*      | W | GBR | 2005 | BR ref     | 4.00 | 2.00 | 4.00 |
| W1798_CASSIUS      | W | GBR | 2005 | BR ref     | 0.25 | 0.25 | 1.25 |
| W0018_MARIS_RANGER | W | GBR | 1966 | trial uk   | 2.00 | 4.00 | 2.75 |
| W1801_PANORAMA     | W | GBR | 2005 | BR ref     | 4.00 | 2.00 | 4.00 |
| W1806_TIMARU       | W | GBR | 2005 | BR ref     | 0.00 | 0.00 | 4.00 |
| W1808_ACROBAT      | W | GBR | 2005 | BR ref     | 0.00 | 0.00 | 1.75 |
| W1811_GRAFTON      | W | GBR | 2005 | BR ref     | 0.00 | 3.50 | 0.25 |
| W1813_CONQUEROR    | W | GBR | 2005 | BR ref     | 1.50 | 0.00 | 2.00 |
| W1825_TYRELL       | W | GBR | 2006 | BR ref     | NA   | NA   | NA   |
| W1827_CHEVRON**    | W | GBR | 2006 | BR ref     | 0.00 | 3.25 | 4.00 |
| W1830_ROCHFORT     | W | GBR | 2006 | BR ref     | 0.00 | 0.00 | 3.50 |
| W1853_INVICTA      | W | GBR | 2006 | BR ref     | 0.00 | 0.00 | 3.25 |
| W1858_SANTANA      | W | GBR | 2006 | BR ref     | 0.00 | 2.00 | 4.00 |

|                     |   |     |      |            |      |      |      |
|---------------------|---|-----|------|------------|------|------|------|
| W1860_EDMUNDS       | W | GBR | 2006 | BR ref     | 0.00 | 0.00 | 0.00 |
| W1865_WARRIOR**     | W | GBR | 2006 | BR ref     | 0.00 | 0.00 | 2.67 |
| W1871_STALWART      | W | GBR | 2006 | BR ref     | 0.50 | 0.00 | 1.50 |
| W1877_KWS_CURLEW    | W | GBR | 2006 | BR ref     | 4.00 | 2.00 | 4.00 |
| W1880_KWS_STERLING  | W | GBR | 2006 | BR ref     | 0.00 | 1.00 | 1.25 |
| W1882_HORIZON       | W | GBR | 2006 | BR ref     | 0.00 | 0.25 | 1.25 |
| W1883_KWS_QUARTZ    | W | GBR | 2006 | BR ref     | NA   | NA   | NA   |
| W1885_BELUGA        | W | GBR | 2006 | BR ref     | 0.00 | 0.67 | 0.75 |
| W1892_CADOGAN       | W | GBR | 2007 | BR ref     | 0.00 | 0.25 | 2.25 |
| W1895_DENMAN        | W | GBR | 2007 | BR ref     | 0.00 | 0.00 | 0.00 |
| W1904_RAINBOW*      | W | DEU | 2007 | BR ref     | 0.50 | 1.25 | 4.00 |
| W1907_KWS_PODIUM    | W | GBR | 2007 | BR ref     | 0.50 | 3.00 | 0.00 |
| W1909_KWS_GYMNAST   | W | GBR | 2007 | BR ref     | 0.00 | 0.50 | 1.25 |
| W1911_KWS_TARGET    | W | GBR | 2007 | BR ref     | 0.00 | 2.75 | 0.00 |
| W1916_KWS_SANTIAGO  | W | GBR | 2007 | BR ref     | 1.50 | 4.00 | 4.00 |
| W0192_DURIN         | W | GBR | 1968 | genbank cz | 2.50 | 0.75 | 3.00 |
| W1922_COCON         | W | GBR | 2007 | BR ref     | 0.50 | 1.75 | 4.00 |
| W0193_TIPSTAFF      | W | GBR | NA   | NA         | 0.00 | 4.00 | 2.75 |
| W1933_ORBIT         | W | GBR | 2007 | BR ref     | 2.00 | 4.00 | 1.50 |
| W1940_GRAVITAS      | W | GBR | 2007 | BR ref     | 0.50 | 4.00 | 2.00 |
| W1941_STIGG         | W | GBR | 2007 | BR ref     | 0.00 | 1.50 | 0.00 |
| W1943_LAZARUS       | W | GBR | 2007 | BR ref     | 0.00 | 4.00 | 0.00 |
| W1947_SHELDON       | W | GBR | 2007 | BR ref     | 2.00 | 4.00 | 2.00 |
| W1954_TUXEDO        | W | GBR | 2007 | BR ref     | 1.00 | 2.25 | 4.00 |
| W0196_SPORTSMAN     | W | GBR | 1974 | trial uk   | 0.00 | 4.00 | 2.00 |
| W0201_ARMADA        | W | GBR | 1974 | trial uk   | 0.00 | 2.75 | 4.00 |
| W0205_KADOR         | W | GBR | 1974 | trial uk   | 0.75 | 2.50 | 3.00 |
| W0023_TOMMY         | W | FRA | 1967 | trial uk   | 0.50 | 2.00 | 1.25 |
| W0230_HUSTLER       | W | GBR | 1975 | trial uk   | 0.00 | 0.00 | 0.00 |
| W0231_BRIGAND       | W | GBR | 1975 | trial uk   | 3.25 | 3.00 | 4.00 |
| W0233_MARDLER       | W | GBR | 1975 | trial uk   | 0.00 | 4.00 | 3.33 |
| W0235_ARGENT        | W | GBR | 1979 | genbank cz | 0.50 | 1.00 | 3.00 |
| W0243_AQUILA        | W | GBR | 1975 | trial uk   | NA   | NA   | NA   |
| W0260_ANVIL         | W | GBR | 1982 | genbank cz | 0.00 | 0.00 | 0.00 |
| W0265_COPAIN        | W | FRA | 1976 | trial uk   | 2.00 | 0.50 | 1.68 |
| W0270_WIZARD        | W | GBR | 1983 | genbank cz | 0.00 | 0.00 | 1.75 |
| W0271_IONA          | W | GBR | 1976 | trial uk   | 1.25 | 0.25 | 2.00 |
| W0272_SENTRY        | W | GBR | 1976 | trial uk   | 0.25 | 0.00 | 1.00 |
| W0273_VILLEIN       | W | DEU | NA   | NA         | 1.00 | 0.00 | 2.50 |
| W0274_BOUNTY        | W | GBR | 1976 | trial uk   | 0.75 | 0.00 | 3.00 |
| W0276_VIRTUE        | W | GBR | 1976 | trial uk   | 1.00 | 0.00 | 1.50 |
| W0286 HERALD        | W | GBR | NA   | NA         | 0.25 | 0.00 | 1.75 |
| W0287_AVALON        | W | GBR | 1979 | trial uk   | 0.00 | 0.50 | 0.50 |
| W0288_MAESTRO       | W | GBR | 1976 | genbank cz | 0.00 | 1.33 | 2.00 |
| W0289_SHIRE         | W | GBR | 1979 | genbank cz | 0.00 | 1.25 | 1.00 |
| W0291_HEDGEHOG      | W | GBR | NA   | NA         | 0.25 | 1.50 | 2.75 |
| W0296_GRANTA        | W | GBR | 1980 | genbank cz | 0.00 | 3.33 | 0.67 |
| W0311_ABELE         | W | GBR | 1978 | trial uk   | 0.00 | 0.50 | 0.00 |
| W0317_CHAMPLEIN     | W | FRA | 1959 | trial uk   | 0.00 | 1.00 | 0.67 |
| W0319_MARIS_WIDGEON | W | GBR | 1960 | trial uk   | 0.00 | 0.67 | 1.67 |
| W0321_NORMAN        | W | GBR | 1979 | trial uk   | 0.50 | 2.50 | 0.67 |
| W0323_FLAMBEAU      | W | GBR | NA   | NA         | 0.00 | 2.00 | 0.33 |
| W0325_RAPIER        | W | GBR | 1978 | trial uk   | 0.00 | 3.00 | 3.25 |

|                       |   |     |      |            |      |      |      |
|-----------------------|---|-----|------|------------|------|------|------|
| W0328_DISPONENT       | W | DEU | 1975 | genbank cz | 1.00 | 0.50 | 3.00 |
| W0364_LONGBOW         | W | GBR | 1979 | trial uk   | 1.00 | 2.00 | 0.00 |
| W0371_JENA            | W | NA  | 1980 | genbank cz | 1.33 | 3.25 | 4.00 |
| W0389_STETSON         | W | GBR | 1980 | trial uk   | 0.00 | 2.00 | NA   |
| W0039_MARIS_SETTLER   | W | GBR | 1967 | trial uk   | 0.00 | 3.25 | 0.00 |
| W0004_BOUQUET         | W | FRA | 1965 | trial uk   | 4.00 | 2.75 | 2.75 |
| W0041_MARIS_BEACON    | W | GBR | 1967 | trial uk   | 0.67 | 3.33 | 4.00 |
| W0042_MARIS_NIMROD    | W | GBR | 1968 | trial uk   | 0.50 | 0.67 | 4.00 |
| W0423_HAMMER          | W | GBR | 1981 | trial uk   | 1.33 | 1.33 | 0.00 |
| W0043_MARIS_ENVOY     | W | GBR | 1974 | genbank cz | 0.00 | NA   | 1.00 |
| W0438_MITHRAS         | W | GBR | 1978 | trial uk   | 2.00 | 2.00 | 0.00 |
| W0439_AVOCET          | W | GBR | NA   | NA         | 1.75 | 4.00 | 0.00 |
| W0440_GALAHAD         | W | GBR | 1982 | listed uk  | 0.88 | 2.25 | 0.00 |
| W0464_FRONTIER        | W | GBR | 1981 | genbank cz | 4.00 | 1.75 | 3.75 |
| W0479_AMBASSADOR      | W | GBR | 1982 | trial uk   | 0.25 | 3.50 | 4.00 |
| W0486_MOULIN          | W | GBR | 1980 | trial uk   | 0.50 | 2.50 | 3.50 |
| W0488_RENARD          | W | GBR | 1982 | trial uk   | 1.00 | 4.00 | 3.67 |
| W0489_BROCK           | W | GBR | 1982 | trial uk   | 1.67 | 2.25 | 3.50 |
| W0491_BRIMSTONE       | W | GBR | 1982 | trial uk   | 1.00 | 3.67 | 2.50 |
| W0496_TONIC           | W | GBR | 1983 | listed uk  | 4.00 | 1.00 | 2.50 |
| W0509_BOXER           | W | GBR | 1982 | trial uk   | 0.00 | 1.67 | 1.00 |
| W0527_GAWAIN          | W | GBR | 1984 | trial uk   | 4.00 | 2.75 | 4.00 |
| W0528_ASLAN           | W | GBR | 1982 | genbank cz | 3.50 | 1.25 | 4.00 |
| W0529_CRAFTSMAN       | W | GBR | 1987 | genbank cz | 1.00 | 2.25 | 1.00 |
| W0531_BOOTY           | W | GBR | NA   | NA         | 0.75 | 1.00 | 4.00 |
| W0533_MERCIA          | W | GBR | 1984 | listed uk  | 0.25 | 0.00 | 0.00 |
| W0537_SLEJPNER        | W | SWE | 1983 | trial uk   | 0.82 | 1.00 | 0.00 |
| W0544_AXONA           | W | NLD | 1984 | listed uk  | 4.00 | 3.75 | 4.00 |
| W0565_PARADE          | W | GBR | 1984 | trial uk   | 0.00 | 1.00 | 1.00 |
| W0584_SARSEN          | W | GBR | 1987 | genbank cz | 0.50 | 1.33 | 1.00 |
| W0585_RENDEZVOUS      | W | GBR | 1984 | trial uk   | 1.00 | 1.67 | 1.75 |
| W0590_CINNABAR        | W | GBR | 1985 | genbank cz | 0.00 | 1.50 | 0.75 |
| W0591_HORNET          | W | GBR | 1984 | trial uk   | 0.00 | 1.67 | 0.33 |
| W0607_APOLLO          | W | DEU | 1985 | trial uk   | 0.00 | 0.75 | 0.67 |
| W0610_SOLEIL          | W | FRA | 1986 | listed uk  | 0.00 | 0.00 | NA   |
| W0612_ARMINDA         | W | NLD | 1976 | genbank cz | 2.50 | 2.67 | 0.00 |
| W0618_MERLIN          | W | DEU | 1956 | trial uk   | 0.00 | 4.00 | 3.00 |
| W0626_SQUADRON        | W | GBR | NA   | NA         | 0.75 | 2.75 | 0.00 |
| W0628_RIBAND          | W | GBR | 1987 | listed uk  | 0.00 | 0.67 | 0.00 |
| W0063_BENNO           | W | DEU | 1969 | trial uk   | 0.00 | 0.00 | 4.00 |
| W0635_MANDATE         | W | GBR | 1985 | trial uk   | 1.25 | 2.25 | 0.00 |
| W0065_MARIS_PLOUGHMAN | W | GBR | 1972 | genbank cz | 0.25 | 1.75 | 1.25 |
| W0066_MARIS_HUNTSMAN  | W | GBR | 1969 | trial uk   | 0.00 | 1.00 | 0.33 |
| W0067_MARIS_TEMPLAR   | W | GBR | 1969 | trial uk   | 0.00 | 1.75 | 4.00 |
| W0670_APOSTLE         | W | GBR | 1986 | trial uk   | 1.50 | 1.25 | 3.00 |
| W0671_PASTICHE        | W | GBR | 1988 | listed uk  | 0.50 | 3.00 | 0.00 |
| W0672_FRESCO          | W | GBR | 1988 | listed uk  | 1.25 | 2.25 | 4.00 |
| W0682_URBAN           | W | DEU | 1988 | trial uk   | 1.67 | 1.00 | 4.00 |
| W0692_BEAVER          | W | GBR | 1989 | listed uk  | 0.00 | 3.00 | 2.00 |
| W0694_HAVEN           | W | GBR | 1988 | listed uk  | 0.25 | 3.25 | 4.00 |
| W0707_AXIAL           | W | FRA | 1988 | trial uk   | 2.50 | 2.50 | 3.00 |
| W0724_EKLA            | W | FRA | 1988 | genbank cz | 1.50 | 3.50 | 3.75 |
| W0728_TALON           | W | DEU | 1988 | trial uk   | 0.50 | 2.50 | 4.00 |



|                  |   |     |      |            |      |      |      |
|------------------|---|-----|------|------------|------|------|------|
| W0732_DEAN       | W | GBR | 1987 | trial uk   | 0.00 | 2.75 | 4.00 |
| W0735_TARA       | W | GBR | 1988 | trial uk   | 0.00 | 3.00 | 3.25 |
| W0736_HEREWARD   | W | GBR | 1989 | listed uk  | 1.00 | 2.37 | 4.00 |
| W0755_ORESTIS    | W | DEU | 1988 | genbank cz | 0.00 | 1.50 | 4.00 |
| W0756_SITKA      | W | GBR | NA   | NA         | 0.00 | 1.25 | 0.00 |
| W0759_ADMIRAL    | W | GBR | 1990 | listed uk  | 0.00 | 0.00 | 2.00 |
| W0760_SOLDIER    | W | GBR | NA   | NA         | 0.25 | 1.50 | 2.00 |
| W0765_SAREK      | W | SWE | 1992 | genbank cz | 4.00 | 2.00 | 4.00 |
| W0770_LANCELOT   | W | NA  | 2002 | listed FRA | 0.67 | 2.00 | 3.50 |
| W0773_TORONTO    | W | DEU | 1990 | listed DEU | 1.00 | 0.00 | 0.75 |
| W0775_ESTICA     | W | NLD | 1990 | listed uk  | 0.00 | 2.00 | 3.00 |
| W0776_WASP       | W | GBR | 1990 | listed uk  | 2.75 | 1.00 | 4.00 |
| W0783_CAPRIMUS   | W | GBR | 1994 | genbank cz | 0.00 | 0.00 | 4.00 |
| W0785_ARISTOCRAT | W | GBR | 1992 | genbank cz | NA   | 2.00 | 4.00 |
| W0787_TORFRIDA   | W | GBR | 1988 | trial uk   | 1.00 | 0.50 | 4.00 |
| W0798_CAMP_REMY  | W | FRA | 1980 | listed FRA | 0.00 | 0.00 | 1.00 |
| W0801_ASTRON     | W | DEU | 1990 | BR ref     | 0.00 | 4.00 | 4.00 |
| W0803_FLETUM     | W | NLD | 1990 | BR ref     | 0.00 | 2.50 | 4.00 |
| W0806_DIABLO     | W | GBR | 1990 | BR ref     | 0.75 | 2.00 | 1.33 |
| W0808_SPARK      | W | GBR | 1991 | listed uk  | 4.00 | 2.00 | 3.50 |
| W0810_ZODIAC     | W | GBR | 1990 | trial uk   | 0.00 | 1.75 | 0.67 |
| W0811_FENDA      | W | GBR | 1990 | BR ref     | 0.67 | 4.00 | 4.00 |
| W0817_HUSSAR     | W | GBR | 1991 | listed uk  | 0.50 | 1.50 | 1.25 |
| W0818_BRIGADIER  | W | GBR | 1991 | listed uk  | 1.38 | 0.63 | 2.71 |
| W0824_BRYDEN     | W | GBR | 1990 | BR ref     | 0.25 | 2.50 | 0.50 |
| W0825_ADROIT     | W | GBR | 1990 | BR ref     | 0.75 | 2.75 | 4.00 |
| W0826_LEO*       | W | NA  | 1990 | BR ref     | 0.00 | 0.33 | 0.50 |
| W0827_RENOWN     | W | NA  | 1990 | BR ref     | 0.50 | 4.00 | 4.00 |
| W0828_HUNTER     | W | GBR | 1991 | listed uk  | 0.00 | 1.67 | 2.67 |
| W0829_VERITAS    | W | GBR | 1990 | BR ref     | 0.00 | 4.00 | 4.00 |
| W0833_CADENZA    | W | GBR | 1991 | listed uk  | 4.00 | 4.00 | 4.00 |
| W0834_SOISSONS   | W | FRA | 1990 | listed uk  | 3.72 | 2.87 | 4.00 |
| W0844_TREND      | W | DEU | 1990 | BR ref     | 0.00 | 4.00 | 3.00 |
| W0847_FLAME      | W | GBR | 1992 | listed uk  | 0.00 | 3.00 | 0.50 |
| W0848_WOODSTOCK  | W | GBR | 1992 | listed uk  | 0.00 | 4.00 | 2.00 |
| W0856_LYNX*      | W | GBR | 1992 | listed uk  | 0.00 | 3.50 | 1.25 |
| W0858_RIALTO     | W | GBR | 1992 | listed uk  | 0.25 | 3.19 | 4.00 |
| W0859_ANDANTE    | W | GBR | 1991 | trial uk   | 0.50 | 1.00 | 1.33 |
| W0862_ATLA       | W | GBR | 1990 | BR ref     | 0.00 | 2.00 | 4.00 |
| W0863_OSTARA     | W | NA  | 1990 | BR ref     | 0.00 | 0.00 | 0.00 |
| W0867_PROPHET    | W | GBR | 1991 | trial uk   | 0.00 | 2.50 | 0.00 |
| W0878_BEAUFORT   | W | GBR | 1993 | listed uk  | 0.00 | 2.00 | 0.75 |
| W0881_ENCORE     | W | GBR | 1993 | listed uk  | 4.00 | 2.67 | 2.00 |
| W0882_CONSORT    | W | GBR | 1993 | listed uk  | 0.00 | 2.00 | 2.00 |
| W0886_TURPIN     | W | GBR | 1991 | BR ref     | 0.00 | 2.00 | 0.00 |
| W0896_DYNAMO     | W | GBR | 1993 | listed uk  | 0.00 | 2.00 | 1.00 |
| W0900_TRAWLER    | W | GBR | 1991 | BR ref     | 0.00 | 1.00 | 3.00 |
| W0931_CAXTON     | W | GBR | 1994 | listed uk  | 0.00 | 2.00 | 3.75 |
| W0932_REAPER     | W | GBR | 1994 | listed uk  | 0.00 | 2.00 | 0.33 |
| W0933_RALEIGH    | W | GBR | 1995 | listed uk  | 0.00 | 3.00 | 1.75 |
| W0934_DRAKE      | W | GBR | 1996 | listed uk  | 0.00 | 2.00 | 4.00 |
| W0938_SHANNON    | W | GBR | 1992 | BR ref     | 0.00 | 0.75 | 3.75 |
| W0939_CHARGER    | W | GBR | 1994 | listed uk  | 0.00 | 2.75 | 3.33 |

|                |   |     |      |           |      |      |      |
|----------------|---|-----|------|-----------|------|------|------|
| W0940_CLOVE    | W | GBR | 1995 | listed uk | 0.00 | 2.25 | 3.75 |
| W0942_NEWHAVEN | W | NA  | 1992 | BR ref    | 0.00 | 1.00 | 2.00 |
| W0943_GALATEA  | W | GBR | 1995 | listed uk | 0.00 | 1.00 | 0.75 |
| W0945_MAGELLAN | W | GBR | 1995 | listed uk | 0.33 | 1.50 | 3.75 |
| W0946_CHIANTI  | W | GBR | 1995 | listed uk | 0.00 | 1.33 | 1.00 |
| W0954_CROFTER  | W | GBR | 1994 | listed uk | 0.00 | 0.67 | 0.00 |
| W0955_RITMO    | W | NLD | 1992 | BR ref    | 0.00 | 1.75 | 4.00 |
| W0966_RUBENS   | W | FRA | 1993 | BR ref    | 2.00 | 0.00 | 0.00 |
| W0967_ABBOT    | W | GBR | 1995 | listed uk | 1.33 | 1.75 | 2.75 |
| W0970_IMPALA   | W | GBR | 1996 | listed uk | 0.50 | 1.00 | 0.50 |
| W0972_ACCLAIM  | W | GBR | 1995 | listed uk | 0.00 | 2.00 | 2.00 |
| W0973_MADRIGAL | W | GBR | 1995 | listed uk | 0.50 | 0.67 | 4.00 |
| W0978_HARRIER  | W | GBR | 1995 | listed uk | 0.00 | 2.50 | 0.50 |
| W0980_MALACCA  | W | GBR | 1995 | listed uk | 0.50 | 4.00 | 0.00 |
| W0982_HUDSON   | W | GBR | 1993 | BR ref    | 0.00 | 4.00 | 0.00 |
| W0983_EQUINOX  | W | GBR | 1995 | listed uk | 1.33 | 4.00 | 2.00 |
| W0992_HOLSTER  | W | GBR | 1993 | BR ref    | 0.00 | 2.50 | 4.00 |
| W0994_WARRIOR  | W | GBR | 1995 | listed uk | 0.00 | 1.00 | 2.00 |
